# Supplementary material for: KIFC1 is essential for normal spermatogenesis and its depletion results in early germ cell apoptosis in the Kuruma shrimp, Penaeus (Marsupenaeus) japonicus
Source: publisher site journal article supplement (doi:10.18632/aging.102601), 2019-12-29
Supplement: Supplementary file [file aging-v11i24-102601-supplementary-material-SD1.pdf]

## SUPPLEMENTARY FIGURES

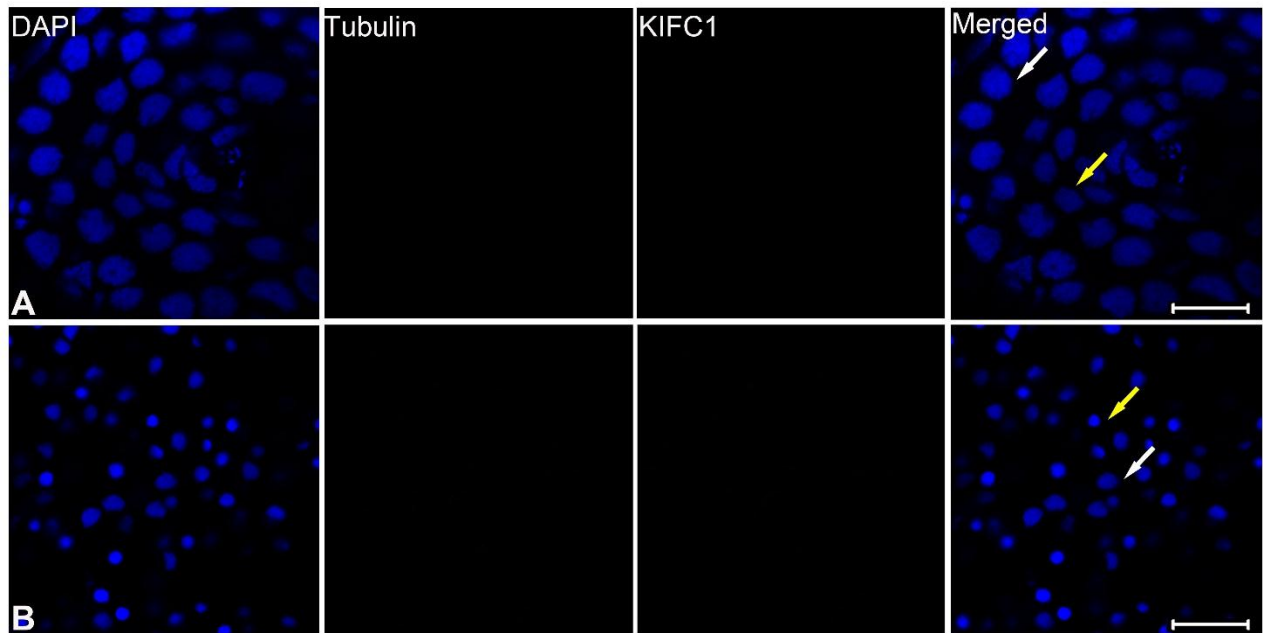

**Supplementary Figure 1. Immunofluorescent localization of KIFC1 and tubulin during spermatogenesis in the control group of *P. japonicus* testis.** (A) Spermatogonia and spermatocyte. No KIFC1 and microtubule signal was found in both spermatogonia (white arrow) and spermatocyte (yellow arrow). (B) Early spermatid and late spermatid. No KIFC1 and microtubule signal was found in both early spermatid (white arrow) and late spermatid (yellow arrow). Blue: DAPI, Green: tubulin, Red: KIFC1. Scale bar= 20 $\mu$ m.

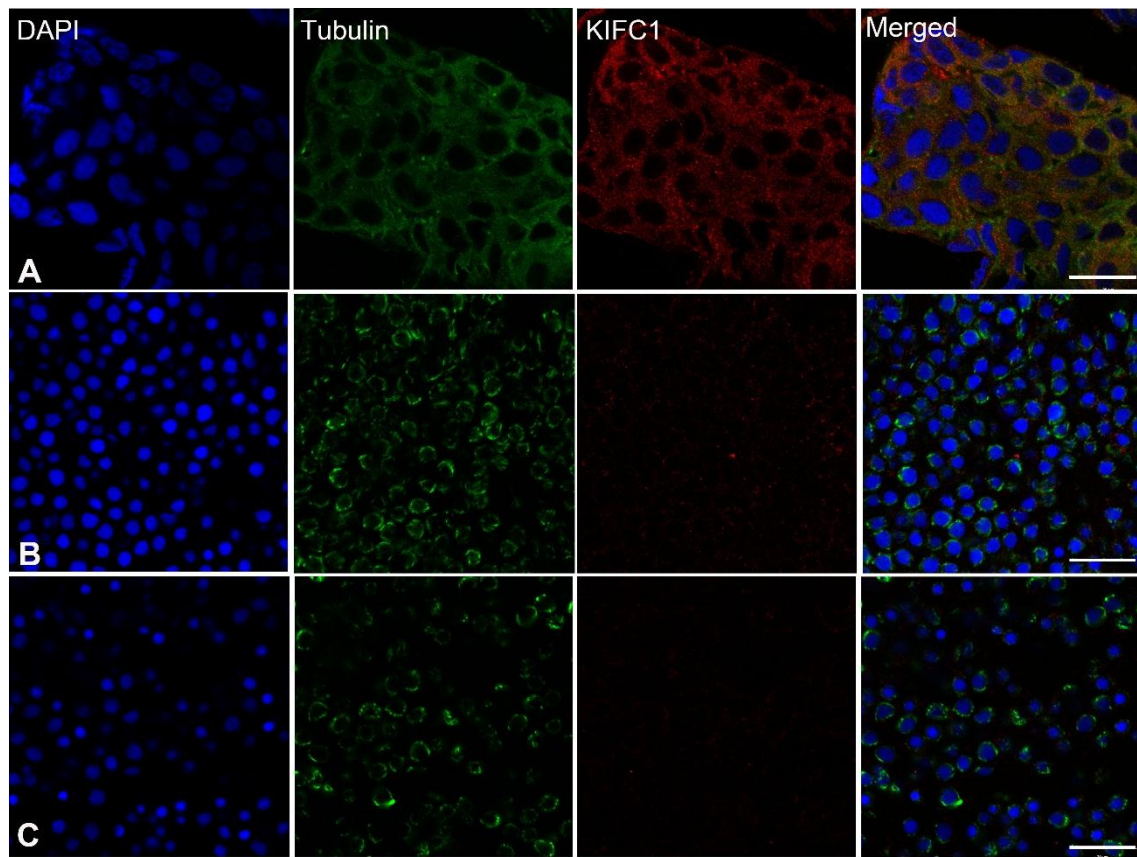

**Supplementary Figure 2. Effects of the control dsRNA (dsEGFP) injected group on the expression and distribution of the microtubules in the testis, vas deferens and spermatosphere.** (A) KIFC1 and microtubules in the testis. (B) KIFC1 and microtubules in vas deferens. (C) KIFC1 and microtubules in spermatosphere. In the control dsRNA (dsEGFP) injected group, the expression and distribution of KIFC1 and microtubules are normal. Blue: DAPI, Green: tubulin, Red: KIFC1. Scale bar = 20 $\mu$ m.
